# Supplementary material
Source: PubMed Central journal article supplement (PMC3809990)
Supplement: NIHMS492467-supplement-supplemental_info.pdf [file NIHMS492467-supplement-supplemental_info.pdf]

## Supplemental Material

**Table 4:** Phenotypic characteristics of the IBD patients by ancestry

| Group                                                       | Non-Jewish              | Jewish                  |
|-------------------------------------------------------------|-------------------------|-------------------------|
| <b>Unaffected (n)</b>                                       | 1636                    | 1036                    |
| <b>Male / female ( % )</b>                                  | 749/887 (45.8/54.2)     | 485/551 (46.8/53.2)     |
| <b>Age, mean <math>\pm</math> s.d. (range)</b>              | 43.9 $\pm$ 11.7 (17-83) | 56.4 $\pm$ 11.7 (15-97) |
| <b>CD (n)</b>                                               | 1304                    | 669                     |
| <b>Male / female ( % )</b>                                  | 589/715 (45.2/54.8)     | 344/325 (51.4/48.6)     |
| <b>Age, mean <math>\pm</math> s.d. (range)</b>              | 39.8 $\pm$ 14.7 (6-85)  | 43.7 $\pm$ 15.5 (9-100) |
| <b>Age at diagnosis, mean <math>\pm</math> s.d. (range)</b> | 23.3 $\pm$ 10.4 (1-80)  | 21.3 $\pm$ 10.9 (2-67)  |
| <b>UC (n)</b>                                               | 1037                    | 189                     |
| <b>Male / female ( % )</b>                                  | 524/513 (50.5/49.5)     | 104/85 (55/45)          |
| <b>Age, mean <math>\pm</math> s.d. (range)</b>              | 42.3 $\pm$ 16.1 (4-90)  | 44.8 $\pm$ 18.2 (12-84) |
| <b>Age at diagnosis, mean <math>\pm</math> s.d. (range)</b> | 29.6 $\pm$ 14.5 (2-82)  | 22.5 $\pm$ 12 (3-77)    |
| <b>Age at diagnosis of CD (Montreal A)</b>                  |                         |                         |
| <b>A1 &lt;16 years</b>                                      | 305 (23.4)              | 205 (30.6)              |
| <b>A2 17 – 40 years</b>                                     | 821 (63)                | 295 (44.1)              |
| <b>A3 &gt; 40 years</b>                                     | 74 (5.7)                | 38 (5.7)                |
| <b>Age at diagnosis of UC (Montreal A)</b>                  |                         |                         |
| <b>A1 &lt;16 years</b>                                      | 178 (17.2)              | 39 (20.6)               |
| <b>A2 17 – 40 years</b>                                     | 611 (58.9)              | 99 (52.4)               |
| <b>A3 &gt; 40 years</b>                                     | 205 (19.8)              | 29 (15.3)               |
| <b>Disease behavior, CD (Montreal B)*</b>                   |                         |                         |
| <b>B1 non-stricturing, non-penetrating</b>                  | 341 (26.2)              | 173 (25.9)              |
| <b>B2 stricturing</b>                                       | 182 (14.0)              | 124 (18.5)              |
| <b>B3 penetrating - excludes perianal</b>                   | 264 (20.2)              | 141 (21.1)              |
| <b>Disease location, CD (Montreal L)</b>                    |                         |                         |
| <b>L1 ileal</b>                                             | 497 (38.1)              | 250 (37.4)              |
| <b>L2 colonic</b>                                           | 98 (7.5)                | 57 (8.5)                |
| <b>L3 ileocolonic</b>                                       | 637 (48.8)              | 345 (51.6)              |
| <b>Perianal only</b>                                        | 6                       | 1                       |
| <b>Disease location, UC (Montreal E)</b>                    |                         |                         |
| <b>E1 ulcerative proctitis</b>                              | 108 (10.4)              | 17 (9.0)                |
| <b>E2 left-sided UC (distal UC)</b>                         | 289 (27.9)              | 61 (32.3)               |
| <b>E3 extensive UC (pancolitis)</b>                         | 600 (57.9)              | 91 (4.8)                |

\*values from case-control data

**Table 5:** Case-Control Cohort Additional Phenotypic Information

|                             | CD             | UC             | Unaffected     |
|-----------------------------|----------------|----------------|----------------|
| Jewish, y/n (% yes)         | 471/799 (36.9) | 90/807 (10)    | 765/825 (47.8) |
| Appendectomy, y/n (% yes)   | 441/481 (34.5) | 170/704 (18.9) | 48/528 (3)     |
| Smokers                     |                |                |                |
| No at diagnosis             | 774            | 607            | 379            |
| Yes at diagnosis            | 258            | 91             | 71             |
| Ex-smoker at diagnosis      | 102            | 190            | 131            |
| Surgery for CD, y/n (% yes) | 669/444 (52.4) |                |                |
| Surgery for UC, y/n (% yes) |                | 173/724 (19.2) |                |

**Table 6:** Logistic regression

|                            | Odds Ratio (95% C.I.) | P value |
|----------------------------|-----------------------|---------|
| Odds of IBD                |                       |         |
| IRF5 Genotypes             |                       |         |
| rs4728142 (A vs G)         | 0.68 (0.52-0.88)      | 0.004   |
| Indel5 (A vs G)            | 0.92 (0.76-1.13)      | 0.44    |
| rs7808907 (C vs T)         | 1.28 (1.02-1.61)      | 0.03    |
| Odds of Ulcerative colitis |                       |         |
| IRF5 Genotypes             |                       |         |
| rs4728142 (A vs G)         | 0.70 (0.52-0.94)      | 0.02    |
| Indel5 (A vs G)            | 0.94 (0.74-1.18)      | 0.58    |
| rs7808907 (C vs T)         | 1.34 (1.03-1.73)      | 0.03    |
| Odds of Crohn's Disease    |                       |         |
| IRF5 Genotypes             |                       |         |
| rs4728142 (A vs G)         | 0.66 (0.51-0.92)      | 0.01    |
| Indel5 (A vs G)            | 0.90 (0.72-1.12)      | 0.36    |
| rs7808907 (C vs T)         | 1.44 (1.11-1.86)      | 0.006   |
| NOD2 SNPs*                 |                       |         |
| 1 or more risk alleles     | 2.68 (1.97-3.64)      | <0.0001 |

\*NOD2 SNPs include rs2066844, rs2066845 and rs2066847;

A multivariate logistic regression model to estimate the effects of the three polymorphisms; IBD, Crohn's and Ulcerative colitis, patients and controls were divided into subgroups according to risk allele counts. Individuals carrying no risk alleles for each of the 3 SNPs served as the reference groups. No significant associations were found when considering other features of clinical value.
